# Supplementary material for: Cdc6 contributes to cisplatin-resistance by activation of ATR-Chk1 pathway in bladder cancer cells
Source: PubMed Central journal article supplement (PMC5130013; doi:10.18632/oncotarget.9616), 2016-05-26
Supplement: oncotarget-07-40362-s001.pdf [file oncotarget-07-40362-s001.pdf]

## Cdc6 contributes to cisplatin-resistance by activation of ATR-Chk1 pathway in bladder cancer cells

### SUPPLEMENTARY FIGURE

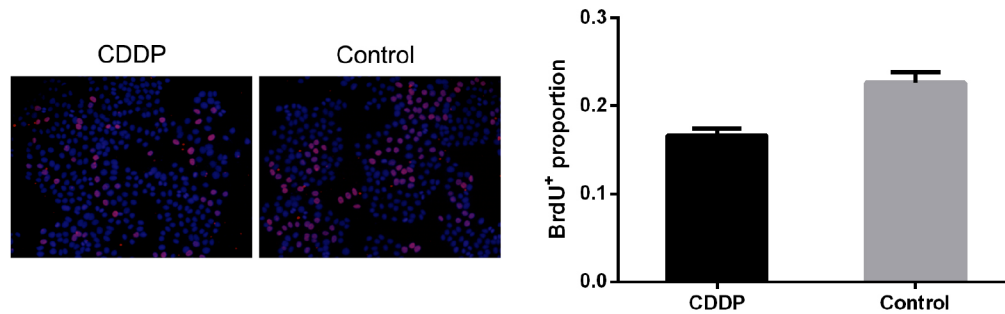

**Supplementary Figure S1: CDDP inhibits DNA synthesis in UMUC3R cells.** To distinguish cell arrest from cell proliferation in S phase, we examined the uptake of BrdU after CDDP treatment. UMUC3R cells were treated with 4  $\mu\text{g}/\text{mL}$  CDDP for 24 h and exposed to 20 $\mu\text{M}$  BrdU one hour before fixation. BrdU immunodetection was administrated as described in Method section. The cells were stained by DAPI (blue) after BrdU stain. As shown in S Figure 1, CDDP treatment reduced the proportion of BrdU<sup>+</sup> (red) cells.
